# Supplementary material for: Glycolysis gene expression profilings screen for prognostic risk signature of hepatocellular carcinoma
Source: publisher site journal article supplement (doi:10.18632/aging.102489), 2019-12-02
Supplement: Supplementary file [file aging-v11i23-102489-supplementary-material-SD1.pdf]

SUPPLEMENTARY FIGURE

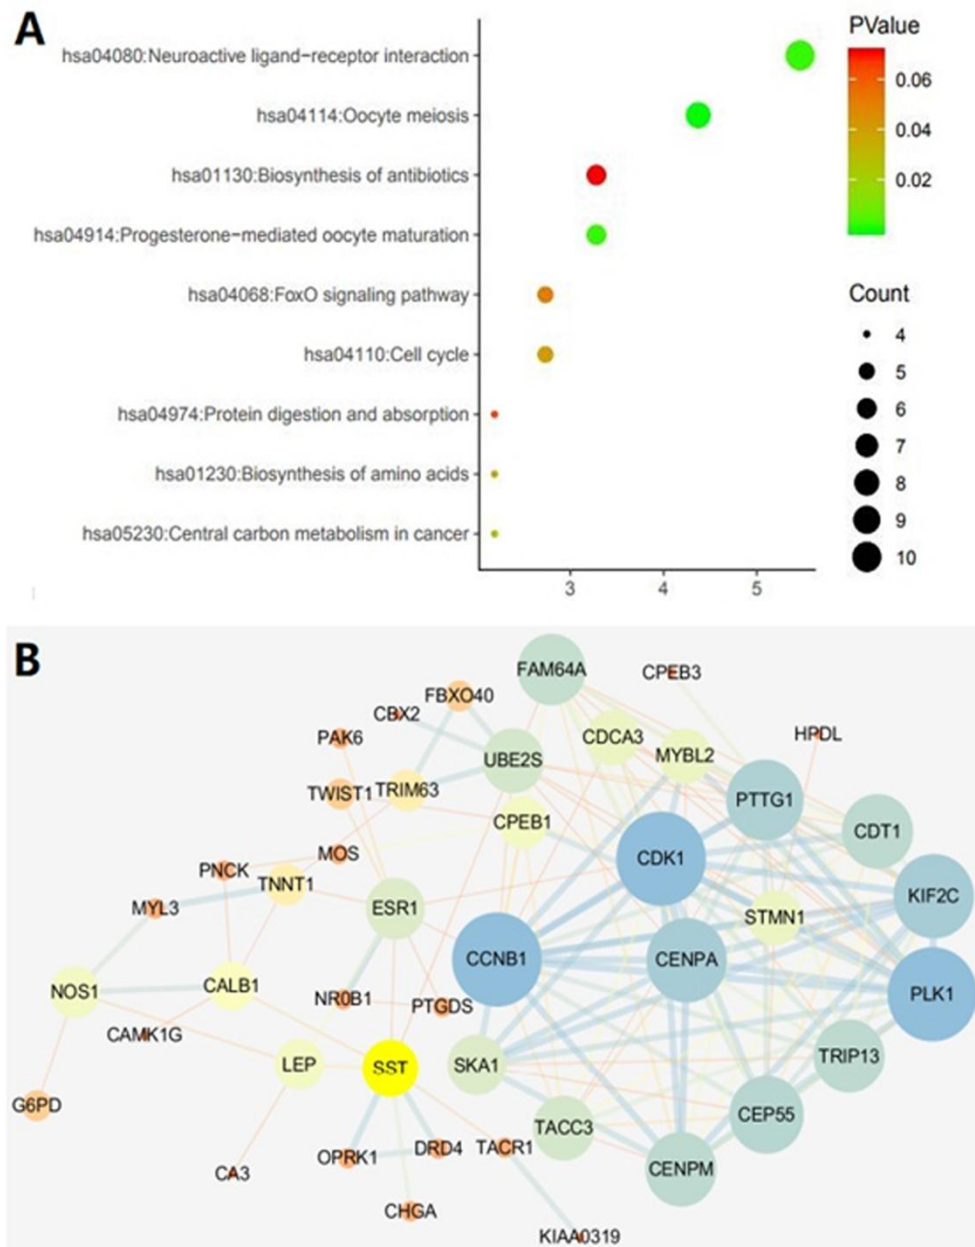

**Supplementary Figure 1. The differentially expressed genes between high-risk and low-risk patients related to the gene signature. (A)** Enrichment plots of differentially expressed genes, **(B)** Networks regulated by risk score-associated genes in HCC constructed by Cytoscape. (Low degree to bright colors for map nodes color, low degree to small sizes for map nodes size, Low combined-score to small sizes for map edge size.)
