# Supplementary material for: Glycolysis gene expression profilings screen for prognostic risk signature of hepatocellular carcinoma
Source: Aging (Albany NY). 2019 Dec 2;11(23):10861–82. doi: 10.18632/aging.102489 (PMC6932884; doi:10.18632/aging.102489)
Supplement: Supplementary Table 1 [file aging-11-102489-s001..xlsx]

## Sheet: ID
Supplementary Table 1. ID of train and validation group.
train	validation
TCGA-UB-A7ME	TCGA-DD-A1EF
TCGA-K7-A5RG	TCGA-CC-5263
TCGA-DD-A73G	TCGA-DD-A3A6
TCGA-XR-A8TE	TCGA-DD-A4NN
TCGA-DD-AAVR	TCGA-BC-A10T
TCGA-DD-A116	TCGA-DD-A4NR
TCGA-DD-AAVW	TCGA-DD-AACC
TCGA-KR-A7K2	TCGA-DD-AAE1
TCGA-UB-AA0V	TCGA-EP-A2KB
TCGA-XR-A8TC	TCGA-BC-A8YO
TCGA-CC-A3MC	TCGA-CC-A8HU
TCGA-RC-A7SH	TCGA-FV-A3R2
TCGA-ED-A66X	TCGA-WQ-A9G7
TCGA-BC-A10Y	TCGA-DD-A1EE
TCGA-2Y-A9GZ	TCGA-DD-AA3A
TCGA-ZP-A9D4	TCGA-DD-A39W
TCGA-DD-AAE9	TCGA-DD-AADC
TCGA-DD-A73C	TCGA-ZS-A9CE
TCGA-FV-A3I1	TCGA-GJ-A9DB
TCGA-K7-A5RF	TCGA-DD-A4NH
TCGA-ED-A7PX	TCGA-MI-A75H
TCGA-WX-AA46	TCGA-CC-A8HV
TCGA-DD-AAW3	TCGA-BC-A10X
TCGA-DD-AADA	TCGA-GJ-A6C0
TCGA-DD-A4NJ	TCGA-CC-A7IH
TCGA-CC-A5UC	TCGA-DD-A73F
TCGA-DD-AACL	TCGA-CC-5260
TCGA-ZP-A9CZ	TCGA-LG-A9QD
TCGA-DD-AAE2	TCGA-DD-AAEH
TCGA-DD-AADK	TCGA-DD-AACB
TCGA-DD-A4NB	TCGA-DD-A4NI
TCGA-BC-A69H	TCGA-DD-A11D
TCGA-DD-A4NA	TCGA-CC-A7IL
TCGA-RC-A7S9	TCGA-FV-A23B
TCGA-WX-AA44	TCGA-FV-A4ZP
TCGA-CC-A9FW	TCGA-EP-A26S
TCGA-DD-AAE0	TCGA-ES-A2HT
TCGA-DD-AACG	TCGA-DD-AADI
TCGA-RC-A6M3	TCGA-GJ-A3OU
TCGA-DD-A115	TCGA-DD-AACW
TCGA-DD-A3A2	TCGA-FV-A3R3
TCGA-DD-AAEK	TCGA-CC-A7IJ
TCGA-DD-AAVS	TCGA-DD-AADU
TCGA-DD-AADV	TCGA-DD-AACI
TCGA-DD-A73E	TCGA-DD-AAEG
TCGA-DD-AADL	TCGA-DD-AAVZ
TCGA-MI-A75G	TCGA-DD-AADQ
TCGA-CC-5259	TCGA-CC-A3MB
TCGA-2Y-A9H7	TCGA-DD-AACX
TCGA-DD-A4NK	TCGA-KR-A7K7
TCGA-DD-AACF	TCGA-CC-A7IK
TCGA-DD-AAEB	TCGA-DD-AACQ
TCGA-DD-AACE	TCGA-ZS-A9CD
TCGA-CC-A7II	TCGA-UB-A7MD
TCGA-DD-AAD2	TCGA-DD-AAC9
TCGA-KR-A7K8	TCGA-RG-A7D4
TCGA-XR-A8TG	TCGA-DD-A3A7
TCGA-DD-AAVV	TCGA-4R-AA8I
TCGA-DD-AAEE	TCGA-BD-A3EP
TCGA-BC-A110	TCGA-DD-A4ND
TCGA-DD-AACS	TCGA-DD-AADW
TCGA-DD-AACK	TCGA-DD-A4NF
TCGA-HP-A5MZ	TCGA-WJ-A86L
TCGA-BW-A5NP	TCGA-MI-A75C
TCGA-MR-A8JO	TCGA-ED-A8O6
TCGA-BC-A3KF	TCGA-DD-A113
TCGA-CC-A8HS	TCGA-DD-AAVQ
TCGA-ZS-A9CF	TCGA-DD-AACD
TCGA-ZP-A9D0	TCGA-DD-AACZ
TCGA-ED-A627	TCGA-EP-A2KA
TCGA-BC-A10Z	TCGA-DD-A39V
TCGA-BD-A2L6	TCGA-DD-A1ED
TCGA-UB-A7MB	TCGA-EP-A2KC
TCGA-BC-A10W	TCGA-DD-A39Z
TCGA-DD-A1EG	TCGA-DD-A1EJ
TCGA-DD-AAD8	TCGA-DD-AAEA
TCGA-CC-A123	TCGA-DD-A118
TCGA-FV-A4ZQ	TCGA-CC-A3MA
TCGA-DD-A1EI	TCGA-CC-5264
TCGA-DD-AADO	TCGA-QA-A7B7
TCGA-CC-A8HT	TCGA-DD-AADF
TCGA-DD-AAD6	TCGA-CC-A7IG
TCGA-ED-A7XP	TCGA-EP-A3JL
TCGA-DD-AADB	TCGA-BC-A69I
TCGA-DD-A1EB	TCGA-CC-5262
TCGA-CC-A9FU	TCGA-ED-A8O5
TCGA-FV-A496	TCGA-DD-AAE6
TCGA-DD-AADD	TCGA-ED-A5KG
TCGA-DD-A3A1	TCGA-DD-AAVX
TCGA-DD-AACY	TCGA-DD-AAE4
TCGA-UB-A7MA	TCGA-ZP-A9D2
TCGA-RC-A7SF	TCGA-CC-A5UD
TCGA-DD-AACA	TCGA-MI-A75I
TCGA-BC-A5W4	TCGA-DD-A4NL
TCGA-DD-A3A4	TCGA-LG-A6GG
TCGA-DD-AAD0	TCGA-DD-A11B
TCGA-BW-A5NO	TCGA-K7-A6G5
TCGA-DD-A73B	TCGA-RC-A6M5
TCGA-NI-A8LF	TCGA-ED-A97K
TCGA-DD-A73D	TCGA-RC-A6M6
TCGA-DD-AAE7	TCGA-G3-A25Y
TCGA-O8-A75V	TCGA-DD-AADP
TCGA-FV-A2QQ	TCGA-DD-AAD5
TCGA-DD-A39X	TCGA-CC-A7IE
TCGA-FV-A3I0	TCGA-BW-A5NQ
TCGA-UB-A7MF	TCGA-DD-A119
TCGA-BC-A217	TCGA-DD-A4NP
TCGA-EP-A12J	TCGA-ED-A7XO
TCGA-DD-AAW2	TCGA-CC-A9FS
TCGA-DD-A73A	TCGA-DD-A1EA
TCGA-ED-A82E	TCGA-HP-A5N0
TCGA-WQ-AB4B	TCGA-DD-A1EK
TCGA-DD-AAD3	TCGA-DD-AACT
TCGA-DD-AAD1	TCGA-DD-AAEI
TCGA-FV-A2QR	TCGA-BC-A216
TCGA-CC-A5UE	TCGA-DD-AACU
TCGA-BC-A10U	TCGA-UB-AA0U
TCGA-MR-A520	TCGA-DD-AAED
TCGA-RC-A6M4	TCGA-DD-A3A5
TCGA-DD-AADG	TCGA-KR-A7K0
TCGA-ED-A4XI	TCGA-WX-AA47
TCGA-MI-A75E	TCGA-DD-A3A8
TCGA-ZP-A9CY	TCGA-CC-A9FV
TCGA-PD-A5DF	TCGA-DD-AACN
TCGA-BC-A3KG	TCGA-2Y-A9H3
TCGA-DD-AADY	TCGA-DD-A4NV
TCGA-DD-A11C	TCGA-DD-A1EC
TCGA-LG-A9QC	TCGA-DD-AADR
TCGA-DD-A4NO	TCGA-XR-A8TD
TCGA-DD-A1EL	TCGA-DD-A4NS
TCGA-DD-AADS	TCGA-NI-A4U2
TCGA-XR-A8TF	TCGA-ZS-A9CG
TCGA-DD-AAW0	TCGA-CC-A1HT
TCGA-DD-AADN	TCGA-UB-A7MC
TCGA-DD-AACH	TCGA-DD-AACV
TCGA-DD-AAVU	TCGA-DD-AAE3
TCGA-DD-A4NG	TCGA-BC-A112
TCGA-DD-A4NE	TCGA-CC-A7IF
TCGA-RC-A7SB	TCGA-DD-A4NQ
TCGA-DD-AACO	TCGA-DD-AAVY
TCGA-DD-A11A	TCGA-DD-AAC8
TCGA-ED-A66Y	TCGA-ED-A7PY
TCGA-DD-A3A3	TCGA-BD-A3ER
TCGA-DD-AAVP	TCGA-ED-A459
TCGA-DD-AAW1	TCGA-CC-5258
TCGA-RC-A7SK	TCGA-DD-A3A9
TCGA-DD-A114	TCGA-ZP-A9CV
TCGA-EP-A3RK	TCGA-CC-A3M9
TCGA-DD-AACJ	TCGA-ED-A7PZ
TCGA-DD-AACP	TCGA-DD-A39Y
TCGA-YA-A8S7	TCGA-DD-A1EH
	TCGA-DD-AADM
	TCGA-K7-AAU7
	TCGA-CC-5261
	TCGA-FV-A495
	TCGA-ZP-A9D1
	TCGA-DD-AADJ
	TCGA-ES-A2HS
